# Supplementary material for: Overexpression of Plasmalemmal Vesicle-Associated Protein-1 Reflects Glomerular Endothelial Injury in Cases of Proliferative Glomerulonephritis with Monoclonal IgG Deposits
Source: PubMed Central journal article supplement — Kidney Int Rep. 2022 Oct 19;8(1):151–63. doi: 10.1016/j.ekir.2022.10.010 (PMC9831946; doi:10.1016/j.ekir.2022.10.010), 2022-10-19
Supplement: mmc1.pdf [file mmc1.pdf]

## Supplementary Material

### Overexpression of Plasmalemmal Vesicle-Associated Protein-1 Reflects Glomerular Endothelial Injury in the Cases of Proliferative Glomerulonephritis With Monoclonal IgG Deposits

**Running Head:** Glomerular PV-1 overexpression in PGNMID

**Authors:** Anri Sawada, MD<sup>1,2\*#</sup>, Kunio Kawanishi, MD, PhD<sup>3\*#</sup>, Yuto Igarashi, MD<sup>4</sup>, Sekiko Taneda, MD<sup>2</sup>, Motoshi Hattori, MD<sup>5</sup>, Hideki Ishida, MD<sup>4,6</sup>, Kazunari Tanabe, MD<sup>4</sup>, Junki Koike, MD<sup>7</sup>, Kazuho Honda, MD<sup>8</sup>, Yoji Nagashima, MD<sup>2</sup>, Kosaku Nitta, MD<sup>9</sup>

**Affiliations:**

<sup>1</sup>Department of Analytic Human Pathology, Nippon Medical School, Tokyo, Japan. <sup>2</sup>Department of Surgical Pathology, Tokyo Women's Medical University Hospital, Tokyo, Japan.

<sup>3</sup>Department of Experimental Pathology, Faculty of Medicine, University of Tsukuba, Ibaraki, Japan. Department of <sup>4</sup>Urology, <sup>5</sup>Pediatric Nephrology, <sup>6</sup>Organ Transplant Medicine, <sup>9</sup>Nephrology, Tokyo Women's Medical University, Tokyo, Japan.

<sup>7</sup>Department of Pathology, St. Marianna University School of Medicine, Kawasaki, Kanagawa, Japan.

<sup>8</sup>Department of Anatomy, Showa University School of Medicine, Tokyo, Japan.

\*Correspondence: [kukawanishi@md.tsukuba.ac.jp](mailto:kukawanishi@md.tsukuba.ac.jp) (lead contact) or [anri-sawada@nms.ac.jp](mailto:anri-sawada@nms.ac.jp),

Department of Experimental Pathology, Faculty of Medicine, University of Tsukuba, 1-1-1, Tennodai, Tsukuba, Ibaraki Japan. Tel: +81-29-853-3944

#A.S. and K.K. contributed equally to this work.

**Supplementary Figure 1-5.**

**Supplementary Table 1-3.**

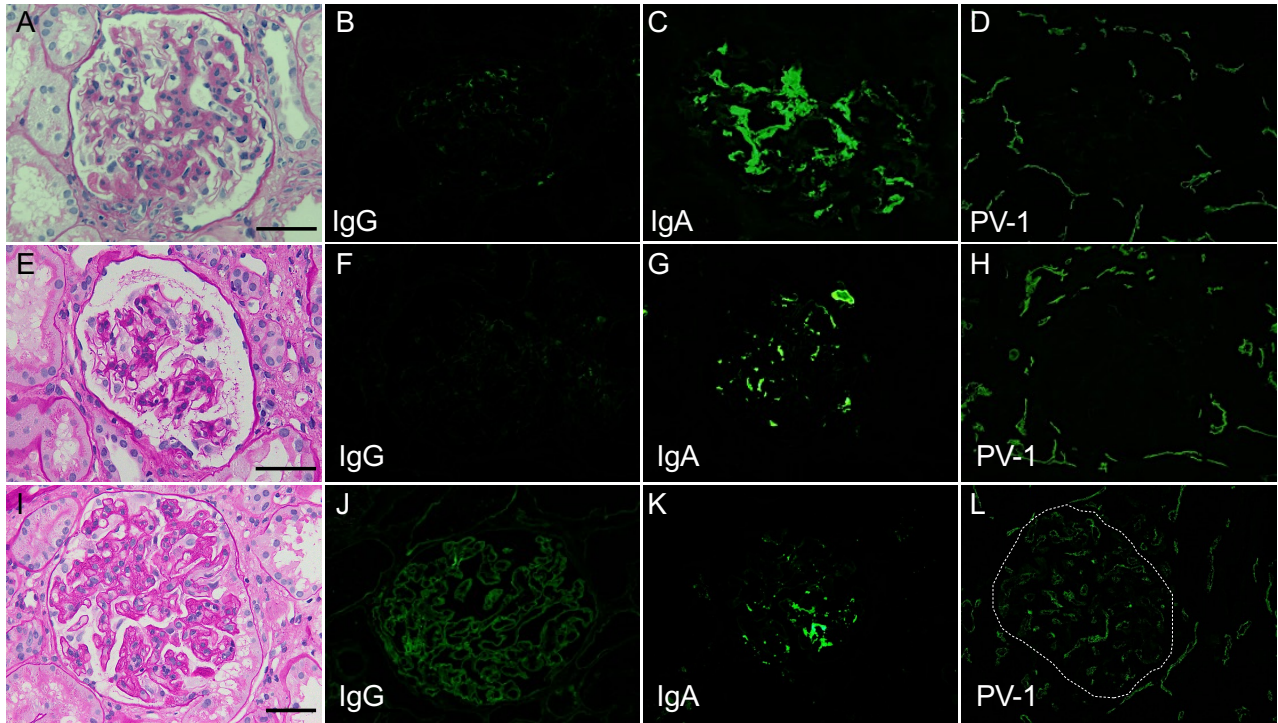

**Supplementary Figure 1. PGNMID is characterized by glomerular overexpression of PV-1.**

IgA nephropathy (A–D) showed no glomerular PV-1 expression (D). An allograft biopsy of the case revealed IgA nephropathy (E–H) without PV-1 expression in glomeruli (H) on the post operative day 1463, however, PGNMID (I–L) was complicated and PV-1 turned to be positive (L, dot circle) at the onset of on the post operative day 1549. (A, E, I) Periodic acid-schiff staining, black bars showed 50  $\mu$ m.

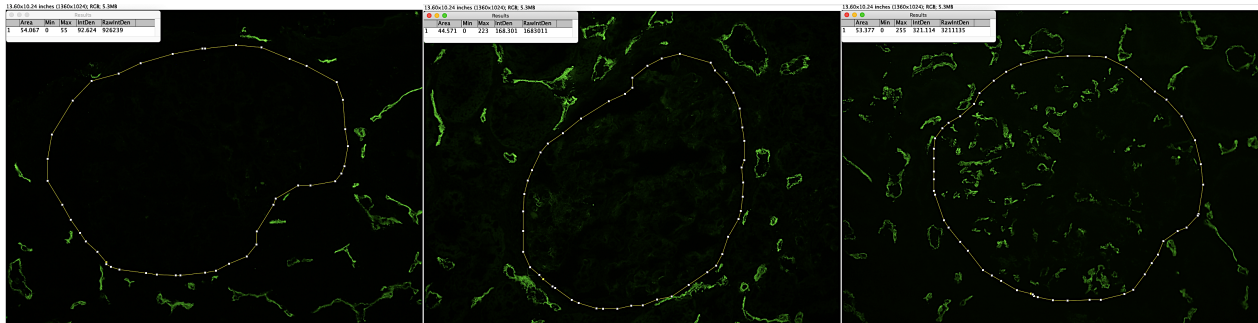

Area 54.06, Integrated density 92.62  
Integrated density / area = 1.71

Area 44.57, Integrated density 168.30  
Integrated density / area = 3.78

Area 53.37, Integrated density 322.11  
Integrated density / area = 6.02

**Supplementary Figure 2. Measurements of glomerular PV-1 intensity.**

The glomerular PV-1 intensities (integrated density /  $\mu\text{m}^2$ ) were measured with Image J.

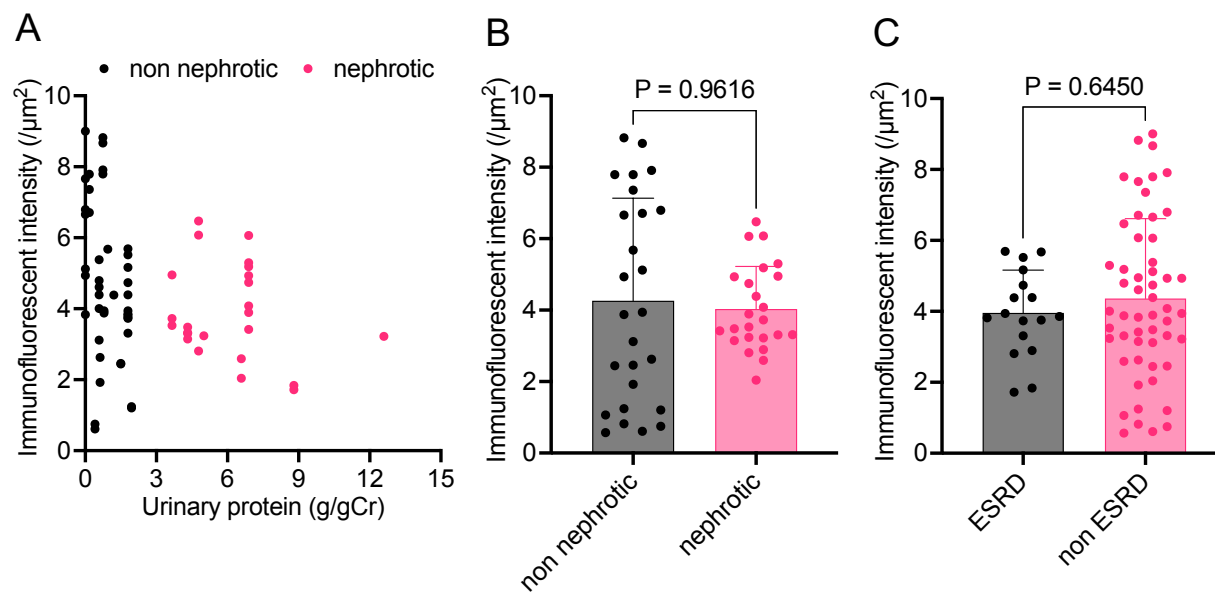

**Supplementary Figure 3. The correlations between the PV-1 intensity and proteinuria or renal prognosis in PGNMID.**

(A) Spearman  $r$  between the glomerular PV-1 intensity and proteinuria are  $-0.3754$  ( $p=0.0131$ ) (non nephrotic  $< 3$  g/gCr) and  $-0.1117$  ( $p=0.6034$ ) (nephrotic  $> 3$  g/gCr), respectively. There is no significant difference either between the non nephrotic and nephrotic group (B) or between the non ESRD and ESRD group (C). ( $n = 22$  patients: one patient was excluded from the analysis, because of lacking data for urinary protein (g/gCr) at the biopsy in the database; Mean with SD, Mann–Whitney test).



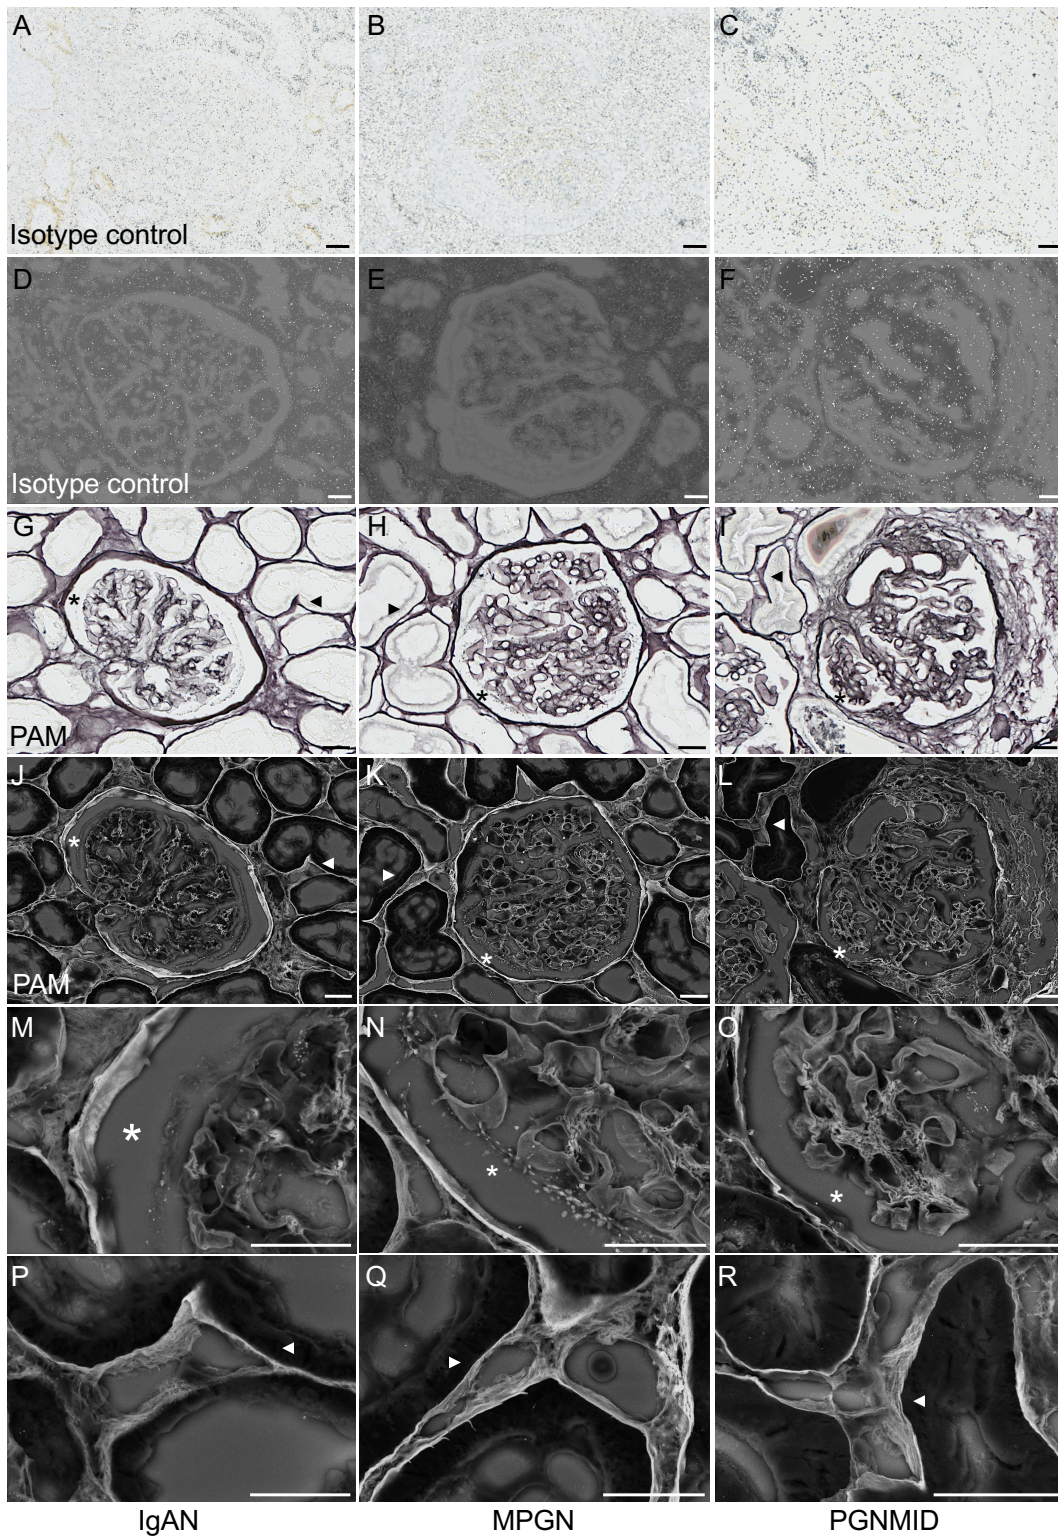

**Supplementary Figure 4. Low vacuum scanning electron microscopy analysis.**

Negative control stain with isotype control for PV-1 antibody (A-C) and those LVSEM image (D-F).

Periodic acid-methenamine silver (PAM) stain (G-I) and those LVSEM images (J-R). Asterix and arrow indicate the same lesions. Bars indicate 20  $\mu$ m.

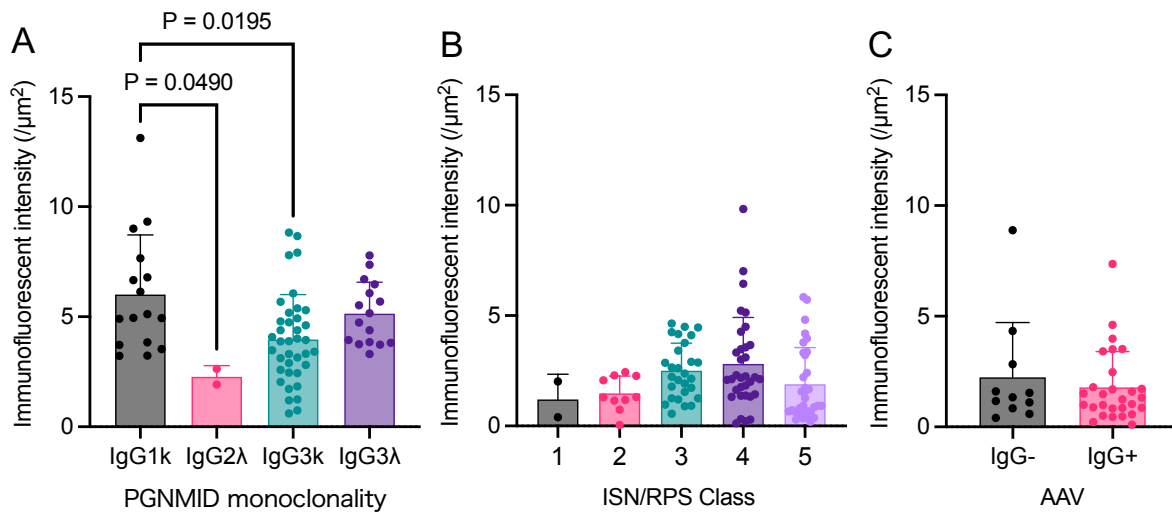

**Supplementary Figure 5. Analysis for the PV-1 intensity and immunoglobulin deposition.**

PV-1 intensities and (A) monoclonal deposition type in PGNMID, (B) International Society of Nephrology (ISN) / Renal Pathology Society (RPS) Classification in lupus nephritis, and (C) IgG deposition negative (-) or positive (+) in antineutrophil cytoplasmic antibody (ANCA) associated vasculitis (AAV) (Mean with SD, Mann–Whitney test).

**Supplementary Table 1. IgA nephropathy and MPGN characteristics**

| Characteristics                        | Value            |                                                    |
|----------------------------------------|------------------|----------------------------------------------------|
|                                        | IgA nephropathy  | MPGN                                               |
| Total case number                      | 54               | 5                                                  |
| Age, year, median (range)              | 36 (16-72)       | 57 (14-76)                                         |
| Sex, male, n (%)                       | 31 (57.4)        | 3 (60)                                             |
| U-pro, g/day or g/g.cr, median (range) | 0.5 (0.03-5.9)   | 3.46 (0.91-7.2)                                    |
| sCr, mg/dl, median (range)             | 0.81 (0.52-2.02) | 1.27 (0.58-2.4)                                    |
| U-OB, n (%)                            | 48 (88.9)        | 1 (20)                                             |
| Other, n (%)                           |                  | Type<br>I, 1 (20)<br>III, 3(60)<br>unknown, 1 (20) |

MPGN, membranoproliferative glomerulonephritis; U-pro, urine protein; sCr, serum creatinine; U-OB; urine occult blood.

**Supplementary Table 2. Lupus nephritis, MCD and FSGS characteristics**

| Characteristics                        | Value                                                                                       |                  |                  |                |
|----------------------------------------|---------------------------------------------------------------------------------------------|------------------|------------------|----------------|
|                                        | Lupus nephritis                                                                             | MCD              | FSGS primary     | FSGS secondary |
| Total case number                      | 51                                                                                          | 21               | 21               | 6              |
| Age, year, median (range)              | 36 (16-66)                                                                                  | 14 (3-64)        | 21 (1-68)        | 48.5 (13-68)   |
| Sex, male, n (%)                       | 8 (15.7)                                                                                    | 13 (61.9)        | 11 (52.4)        | 4 (66.7)       |
| U-pro, g/day or g/g.cr, median (range) | 0.97 (0.01-10.6)                                                                            | 2.34 (0.05-23.1) | 5.35 (0.49-38.3) | 1 (0.63-2.07)  |
| sCr, mg/dl, median (range)             | 0.64 (0.4-1.87)                                                                             | 0.45 (0.23-1.47) | 0.9 (0.15-1.88)  | 1.56 (0.7-5.1) |
| U-OB, n (%)                            | 23 (45.1)                                                                                   | 5 (23.8)         | 12 (57.1)        | 1 (16.7)       |
| Other, n (%)                           | ISN/RPS Class<br>I, 1 (2)<br>II, 5 (9.8)<br>III, 13 (25.5)<br>IV, 16 (31.4)<br>V, 16 (31.4) |                  |                  |                |

MCD, minimal change disease; FSGS, focal segmental glomerulosclerosis; ISN/RPS Class, International Society of Nephrology (ISN) / Renal Pathology Society (RPS) Classification

**Supplementary Table 3. MN, C3 glomerulopathy and AAV characteristics**

| Characteristics                              | Value                                  |                    |                                                                          |                       |
|----------------------------------------------|----------------------------------------|--------------------|--------------------------------------------------------------------------|-----------------------|
|                                              | MN primary                             | MN secondary       | C3 glomerulopathy                                                        | AAV                   |
| Total case number                            | 15                                     | 9                  | 6                                                                        | 16                    |
| Age, year,<br>median (range)                 | 68<br>(22-74)                          | 60<br>(6-78)       | 16.5<br>(11-73)                                                          | 68<br>(14-84)         |
| Sex, male, n (%)                             | 9 (60)                                 | 4 (44.4)           | 3 (50)                                                                   | 8 (50)                |
| U-pro, g/day or<br>g/g.cr,<br>median (range) | 2.66<br>(0.08-19.7)                    | 5.14<br>(0.8-15.5) | 0.53<br>(0.04-2.8)                                                       | 0.61<br>(0.4-3.86)    |
| sCr, mg/dl, median<br>(range)                | 0.84<br>(0.53-7.0)                     | 0.6<br>(0.4-1.27)  | 0.61<br>(0.43-1.55)                                                      | 1.46<br>(0.78-9.72)   |
| U-OB, n (%)                                  | 9 (60)                                 | 7 (77.8)           | 6 (100)                                                                  | 16 (100)              |
| Other,<br>n (%)                              | PLA2R,<br>4 (26.7)<br>THSD7A,<br>0 (0) |                    | C3 glomerulonephritis,<br>4 (66.7)<br>Dense deposit disease,<br>2 (33.3) | MPO-ANCA,<br>16 (100) |

MN, membranous nephropathy; AAV, antineutrophil cytoplasmic antibody (ANCA) associated vasculitis; PLA2R, phospholipase A2 receptor; THSD7A, Thrombospondin type-1 domain-containing 7A; MPO, myeloperoxidase.
